# Supplementary material for: Expression profiling of lymph node cells from deer mice infected with Andes virus
Source: PubMed Central journal article supplement (PMC3637227; doi:10.1186/1471-2172-14-18), 2013-04-09
Supplement: 1471-2172-14-18-S1.pdf [file 1471-2172-14-18-S1.pdf]

**Table S1.** Primers for the real-time PCR array, listed 5' to 3'.

| Gene    | Forward                  | Reverse                 |
|---------|--------------------------|-------------------------|
| Asb2    | GTGCATCAGCCCTTTATGAGG    | CATCCTTGTGGCTTTGTGG     |
| Cacna1f | TGCAGTGTGTGTTTGTGGC      | ACCAATGCAGGCGAACAT      |
| Ccl11   | TCTCACTGTGTAACCCTGGCT    | GCAGGTGGATCTCTGTGAGTT   |
| Ccl7    | TCTGCCAGCTCTCACTGAA      | AGCAGCAGGCACAGAAGTATG   |
| Ccr3    | TTGGCAATTTCTGACCTGC      | ATGTGATGGCCAAAACGC      |
| Ccr4    | GCAGGTGGATCTCAGTATGTG    | CTCTGTATGTAACAGCCCTGG   |
| Ccr6    | TGCTCCTTGGAAAGAGGTCA     | CCACCATAATATTGCCCAGG    |
| Cebpb   | TGCTCCTTGGAAAGAGGTCA     | GCAAAGGTCAACACCACCA     |
| Chd7    | ATGCAGCAGAAGTTGGTGG      | GCTGCTTGAACAAGTTCCG     |
| Fasl    | ACTTCCGGGGTCATTCTTG      | TCCATTAGCACCAGTTCCC     |
| Fosl1   | TCCTCCTGAATGGCACAAC      | CTTGATGTGGAGGCTTGGA     |
| Gata3   | AGTCCGCATCTCTTCCACCTTCC  | GGCACTCTTCTCATCTTGCCG   |
| Gata4   | AGGGTGAACCTGTGTGCAA      | TGGGCTTTCGTTTTCTGG      |
| Gfi1    | GCATCAAATGCAGCAAGG       | ATCTCGCACGCAAATGGT      |
| Gpr44   | TGCAAGTTTCACTCCTCGG      | TGGTTTTGTGCCCACT        |
| Havcr2  | GAATGCATATCTGCCCTGC      | CCAATTGGCACACCATGA      |
| IFNg    | GGCTATTCTGGCTGTTACTGCC   | ATCCCCGACATCTGAGCTACTTG |
| Hoxa10  | AAAGCACAAACGCTGGA        | CCAAATCTTGACCTGCCTG     |
| Hoxa3   | AGCGTTTGAAAACCGTGG       | CAGAATGTGAGCAGCAAGGA    |
| Icos    | GGTGTGCAGCTTTTATTGTGG    | TCACTATTGGGGTCATGCG     |
| IL21    | AACTCAAGCCAGCAAACACAGG   | GCTGCTTTTTTCTCAGCCTTGG  |
| Igsf6   | AGAAGCCTGTGGTTTTCGCT     | TTGGTCTGGTCCAGGGTT      |
| Ikzf2   | TTTCTGCCATGCATCCCT       | TTCCTGCCTTCCATCACAA     |
| Il12b   | TGTTCTCATGGGCTGATCC      | GGCAGCCTTGGTTGAAAA      |
| Il12rb2 | CCTCCGTGGGACATCATAA      | TGAGTCGATTGCGAACCA      |
| Il13    | TGCAAACCCATCTACAAGACCC   | GCCACTTCGATTTTGGTATCCG  |
| Il13ra1 | TGGTGTCTTCTCCTGATGCTG    | AGCGTTCGCTCCAATTA       |
| Il17a   | AGTATCCCTCTGTGATCTGGGAGG | GGATCTCTTGTGATGAGAACAG  |
| Il17re  | TCCTTTGATTTGCTGCCC       | TTCACATTCAGTGCCCA       |
| IL23    | AGAAATGATGTCCCCCGTATCC   | CAGACCTTGGTGGATTCTTTGC  |
| Il18r1  | TAACCAGACCAGGCTCGAA      | AAGTGCAGCTGTTGGTTGG     |
| Il18rap | AACACAACACGGACCATCC      | CTGCGACCAAAAATGCTCA     |
| Il1r1   | TGCAAAGCCAGGTTTACA       | TTTGTGCTCACCCATAGCAG    |
| Il1r2   | TATGTGGAAGTGGCCCTGA      | TGGATTCTGGCAACACA       |
| Il1r1l  | AATGCAGGGGACCATCAA       | TTGGCACTGGCATTGTTG      |
| Il2ra   | TGCCACATTCAAAGCCCT       | CCAACCTCTTTGTTCTTCCG    |
| Il4ra   | AGAACCCTGTTCCCAACCA      | TTGGATGGCAACTCCATGT     |
| TGFb    | CGTGGAATCTACCAGAAATACAGC | TCAAAGACAACCACTCAGGCG   |
| Irf1    | TCCCAAAGAATTGCTGCC       | CCACACAGGACCCATTTT      |
| Irf4    | CAGATGGGCTCTATGCCAA      | TTTGTGGGCCGATCACT       |
| Irf8    | AGGTGACCCGGAAGTTGTT      | GCCGTTTCACAAACACACC     |
| Jak1    | TCCCTTCGAATGACAGTGG      | ACATTTGGTTTCTGCCGC      |
| Lrrc32  | ATTGGAATGGGCACCAA        | CCAAGCTGGCAAAGGTGTA     |
| Maf     | TTATTCGCCCTTGTGTC        | TGGGTGCAAGTTGTCCA       |
| Myb     | AGGCACAGCATTGTTCCAC      | TTGGGAGTTGAGGTGCTGA     |
| Nfatc1  | CTGCCCACTGGATTCAAAC      | TGCTTGCTTCCACAATGC      |

| Gene      | Forward                    | Reverse                   |
|-----------|----------------------------|---------------------------|
| Nfatc2    | TTAAGCCGCATGCCTTCT         | TTGGTGTGCCCAATCT          |
| Nfatc2ip  | TCCGGGGATCTCATTGAA         | TAGCCCTTATGGGGCAA         |
| Nr4a1     | AAGCCTTTCAGCCTCCAAC        | ATCGGAACCTGCCATTCA        |
| Nr4a3     | TGGCACGCTCATTTTCCT         | TTCCATGAAGAACGGCCT        |
| Perp      | CTCTTCTGCGGCTTCATCA        | AAAACGAGCATCTGGGGTC       |
| Pkd2      | ATTTGGACCGCGAAACG          | TGGCAATGATTCCCCAGT        |
| Pou2f2    | CCAAAATGCTTGAACCG          | AAGGTGCGAGCGAATTGT        |
| Pparg     | TTTCCGAAGAACCATCCG         | GGCACTTCTGGAAACGACA       |
| Rora      | TGCAACAGTGGCAACCAT         | CACAAAAGGAGCAGGCAGA       |
| Runx1     | GGGCGAATCACACTGAATG        | TCCTTTCGAAAACGCACC        |
| Runx3     | CCAGGCTACAGCAAGAAACA       | TCCCCACATCCTCTGTTCA       |
| Socs1     | TGAGATCGCGAAGAACCTG        | GGAAGGGGAAGGAACTTCA       |
| Socs5     | CGGTTTGGGGACCATTTTA        | TCAATCCCCGTCTGTCAT        |
| Stat1     | GGTGCATCATGGGCTTTA         | TGAATGTGATGGCCCCTT        |
| Stat4     | AACCATTTACCTTCTGGACCTGG    | TTGCTCACGAAGCCCATGATGTACC |
| Stat6     | CGCTTTAGCGACTCTGAGATTGG    | TCTTTGGCAGAAAATGGCTGG     |
| Tbx21     | GCCAACCAAGGATATGGT         | GAATGTGGGCTTCATGCTC       |
| Tgif1     | AAACGGGCAGCAAAGATG         | CTCTTGCCATCACCCTTGA       |
| Il4       | CCCCGTGCTTGAAGAACAATTC     | GGACTCATTCCCAGTACAGCTTTTC |
| Il10      | TAAGGGTTACCTGGGTTGCCAAG    | CAAATGCTCCTTGATTTCTGGGC   |
| Tmed1     | CGGAGCATCCAGATGATGA        | ACATTGGCAGCTGACCCTA       |
| Tnfrsf9   | ATAGATGGTTGTGAGCCACC       | TGTTAAGAGCACTGGCTGC       |
| Trp53inp1 | ATGAGCCAACCACACTTGC        | GGGAAATGCGCTCTTTGA        |
| Uts2      | GGCTTTCTCTGGACAAGACTC      | TCCAGAAGCATTCCGAGAC       |
| Zbtb7b    | TGCCCAATGGTGAAGACA         | AAACGCTTTTCGGGGCT         |
| Zeb1      | CCCAACAAAACAGCTGCAA        | ATCCACAGCCCCATCAA         |
| IL5       | GAAGAATCAAACCTGTCCGTGGG    | ACACTGCTCTTTTTGGCGGTC     |
| Ddx58     | CCAATGGAAGGTTGGGA          | TGGGTTTGATTCTGGCCT        |
| Ifna2     | ACTCATCTGCTGCTTGGGA        | TTGCAGGTCTTTGAGCTGG       |
| Ifnb1     | TGCCTTCGTCATCCAAGAG        | TCTCATTCCACCCAGTGCT       |
| Il12a     | TCCAAAAACCTGCTGAGGACCAC    | AATCAACGTCTTCAGGAGTGCAG   |
| Il6       | CCATCCAACCTCATCTGAAAGC     | CCACAGATTGGTACACATAGGCAC  |
| Irf3      | TAGAAAAGGAAGCCCCAGC        | TGGTGCCAACACTGGTTTC       |
| Mapk1     | TGCTGTGGAGTTGATGGTG        | AACAGTCATGCAAGGGCA        |
| Tnf       | TGTAGCCACGTTGTAGCAAACC     | CTGGTTGTCTTTGAGATCCATGC   |
| Mx1       | ATTGCTGGGGAAAACTGG         | TGATGCCAGGCAGATCAA        |
| Oas2      | TGGACGAGTTTCGACATTGC       | AAGATGCAGAGCTGCTGGT       |
| Traf6     | TTGTCCCAATGTCAACG          | AATGGCATGGACACAGCA        |
| Ccl2      | CAGACGTACACAAGAAAACCTGGACC | GTCAAGTTCGCATTCAAAGGTGC   |
| Ccl3      | AGCCAGGTGTCATTTTCTTAACC    | CAGCTCAGTGATGTATTCTTGACC  |
| Ccl4      | TGCTGCTTTTCTTACTGCTCG      | TCTAGTGAGGAATACCACTGCTGGC |
| Ccl5      | CCACGTCAAGGAGTATTCTACACC   | TCCTGAACCCACTTCTTCTTTGG   |
| Cxcl2     | ATGGTCAGGAAGTTTGCCTCG      | TACAGCAGCCATACTCCGATTC    |
| TCRb      | CAATAACATCACCTACTGCCTGAGC  | GTAAGCCCATAGAACTGGACTTGG  |
| CD4       | GGTTGAAATGAAGGACCTGAGG     | CCTCTGGATGAAACCTGGATTTTGG |
| CD8a      | AAGAAGAGCGGATTGGACTTCG     | AGATGAGAGTGATGACCAGGGACAG |
| Foxp3     | AAGCAGATCACCTCCTGGATGAG    | TAGACCCAGCTTCTCCTTTTCC    |

| Gene  | Forward                   | Reverse                   |
|-------|---------------------------|---------------------------|
| Lta   | ATGGTGTCTCCCATCTACACTTCAG | TTGAAACGGTCAGCATGGAGG     |
| GAPDH | GGTGCCAAAAGGGTCATCATCTC   | GCAGGAAGCGTTGCTGATAATCTTG |
