# Supplementary material for: Expression profiling of lymph node cells from deer mice infected with Andes virus
Source: PubMed Central journal article supplement (PMC3637227; doi:10.1186/1471-2172-14-18), 2013-04-09

**Figure S1.**

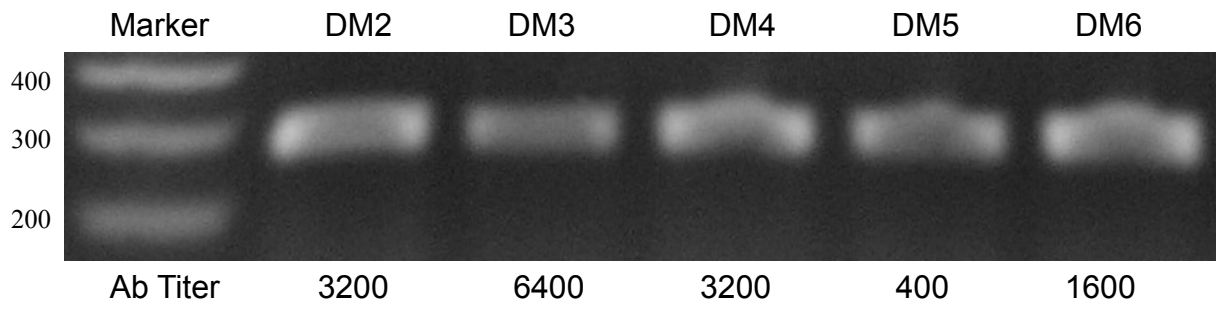

Supplement: 1471-2172-14-18-S2.pdf [file 1471-2172-14-18-S2.pdf]
